# Supplementary material for: Direct identification of forensic body fluids by MALDI-MS
Source: Royal Society of Chemistry journal article supplement (doi:10.1039/c9an01385g), 2019-01-01
Supplement: c9an01385g1.pdf [file c9an01385g1.pdf]

## Supporting information

# Direct identification of forensic body fluids by MALDI-MS

Yuming Jiang,<sup>a,b</sup> Jie Sun,<sup>a,b</sup> Xi Huang,<sup>a,b</sup> Huixia Shi,<sup>\*c</sup> Caiqiao Xiong,<sup>\*a,b</sup> and Zongxiu Nie<sup>a,b</sup>

<sup>a</sup> Beijing National Laboratory for Molecular Sciences, Key Laboratory for Analytical Chemistry for

Living Biosystems, Institute of Chemistry, the Chinese Academy of Sciences, Beijing 100190, China.

<sup>b</sup> University of CAS, Beijing 100049, China.

<sup>c</sup> Institute of Forensic Science, Ministry of Public Security P.R.C, Beijing 100038, China

✉Corresponding author:

Caiqiao Xiong, E-mail: [xiongqcq@iccas.ac.cn](mailto:xiongqcq@iccas.ac.cn)

Huixia Shi, E-mail: [shihuixia6@163.com](mailto:shihuixia6@163.com)

## CONTENT:

**Table S1:** An overview of the information including age and gender of all volunteers.

**Table S2:** Repeatability and reproducibility test of the MALDI methods for human body fluids identification.

**Table S3:** An overview of the predicted and actual body fluid types of the ten tested samples.

**Figure S1:** Mass spectrum of seminal fluid with different matrixes (A) NEDC . (B) CHCA . (C) DHB. The red star symbols represent background interference peaks.

**Figure S2:** Mass spectra of seminal fluid with different storage time. (A) fresh blood sample. (B) storage for three months. (C) storage for six months. (D) storage for a year. The peaks that are labeled represents the characteristic peaks of seminal fluid.

**Figure S3:** Mass spectra of seminal fluid deposited on different materials. (A) no deposition. (B) cotton (C) tissue (D) fabric. The peaks that are labeled represents the characteristic peaks of seminal fluid.

**Figure S4:** Mass spectra of saliva with different storage time. (A) fresh blood sample. (B) storage for three months. (C) storage for six months. (D) storage for a year. The peaks that are labeled represents the characteristic peaks of saliva.

**Figure S5:** Mass spectra of saliva deposited on different materials. (A) no deposition. (B) cotton (C) tissue (D) fabric. The peaks that are labeled represents the characteristic peaks of saliva.

**Figure S6:** Mass spectrum of urine with different storage time. (A) fresh blood sample. (B) storage for three months. (C) storage for six months. (D) storage for a year. The peaks that are labeled represents the characteristic peaks of urine.

**Figure S7:** Mass spectra of urine deposited on different materials. (A) no deposition. (B) cotton (C) tissue (D) fabric. The peaks that are labeled represents the characteristic peaks of urine.

**Figure S8:** Mass spectra of sweat with different storage time. (A) fresh blood sample. (B) storage for three months. (C) storage for six months. (D) storage for a year. The peaks that are labeled represents the characteristic peaks of sweat.

**Figure S9:** Mass spectra of sweat deposited on different materials. (A) no deposition. (B) cotton (C) tissue (D) fabric. The peaks that are labeled represents the characteristic peaks of sweat.

**Figure S10:** 2D plots of the principle component analysis (PCA) scores for the matrix assisted laser desorption ionization mass spectrometry (MALDI-MS) data from five kinds of body fluids.

**Figure S11:** Variable importance for the projection (VIP) scores from partial least-squares discriminant analysis (PLS-DA) for MS data from five kinds of human body fluids.

**Figure S12:** Photographs of human body fluids deposited on different materials.

**Figure S13:** Mass spectra of ten unknown human body fluid samples deposited on different carrier materials.

**Table S1:** An overview of the information including age and gender of all volunteers.

| volunteers | gender | age   |
|------------|--------|-------|
| 1          | male   | 20~30 |
| 2          | male   | 20~30 |
| 3          | male   | 15~20 |
| 4          | female | 20~30 |
| 5          | female | 20~30 |
| 6          | male   | 40~50 |
| 7          | female | 30~40 |
| 8          | female | 20~30 |
| 9          | male   | 20~30 |
| 10         | male   | 40~50 |
| 11         | male   | 40~50 |
| 12         | male   | 15~20 |
| 13         | male   | 30~40 |

\*there are nine samples for each body fluid type, some volunteers only provide a kind of body fluids.

**Table S2.** Repeatability and reproducibility test of the MALDI methods for human body fluids identification.

| <i>m/z</i> | Body fluid | Repeatability<br>shot-to-shot RSD | Reproducibility<br>sample to sample RSD |
|------------|------------|-----------------------------------|-----------------------------------------|
| 615        | Blood      | 6.7%                              | 20.4%                                   |
| 650        |            | 5.5%                              | 17.8%                                   |
| 191        | Semen      | 0%                                | 0%                                      |
| 146        |            | 4.8%                              | 15.2%                                   |
| 215        |            | 5.7%                              | 13.8%                                   |
| 154        |            | 6.4%                              | 21.7%                                   |
| 175        |            | 8.7%                              | 18.3%                                   |
| 795        |            | 8.5%                              | 17.8%                                   |
| 788        |            | 7.1%                              | 14.4%                                   |
| 191        | Urine      | 3.7%                              | 5.9%                                    |
| 167        |            | 5.7%                              | 12.9%                                   |
| 203        |            | 10.3%                             | 27.9%                                   |
| 97         | Saliva     | 5.3%                              | 21.3%                                   |
| 133        |            | 8.1%                              | 22.7%                                   |
| 215        |            | 11.2%                             | 22.5%                                   |
| 89         | Sweat      | 4.7%                              | 11.4%                                   |
| 125        |            | 7.1%                              | 13.5%                                   |

- a. The repeatability (shot-to-shot RSD) was measured based on 20 shots at different locations on the spot.
- b. The reproducibility (sample-to-sample RSD) was measured based on 15 spots (5 samples) in different batches.
- c. The RSDs were obtained by the relative peak intensity to the strongest peak of selected peaks in MALDI-TOF MS.

**Table S3.** An overview of the predicted and actual body fluid types of the ten tested samples.

| Unknown body<br>fluid samples | Predicted type | Actual type   |
|-------------------------------|----------------|---------------|
| 1                             | Seminal fluid  | Seminal fluid |
| 2                             | urine          | urine         |
| 3                             | saliva         | saliva        |
| 4                             | urine          | urine         |
| 5                             | sweat          | sweat         |
| 6                             | unknow         | saliva        |
| 7                             | blood          | blood         |
| 8                             | blood          | blood         |
| 9                             | sweat          | sweat         |
| 10                            | Seminal fluid  | Seminal fluid |

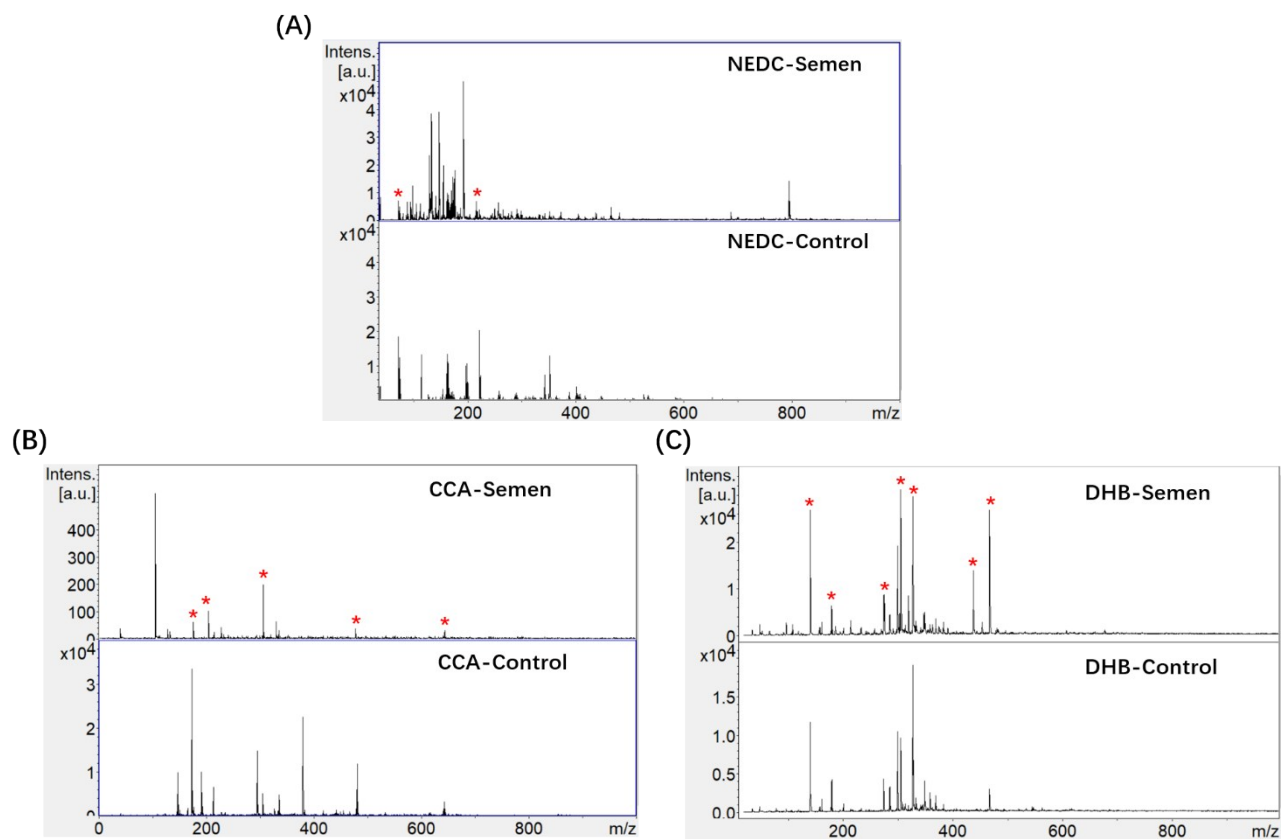

**Figure S1.** Mass spectrum of seminal fluid with different matrixes (A) NEDC . (B) CHCA . (C) DHB. The red star symbols represent background interference peaks.

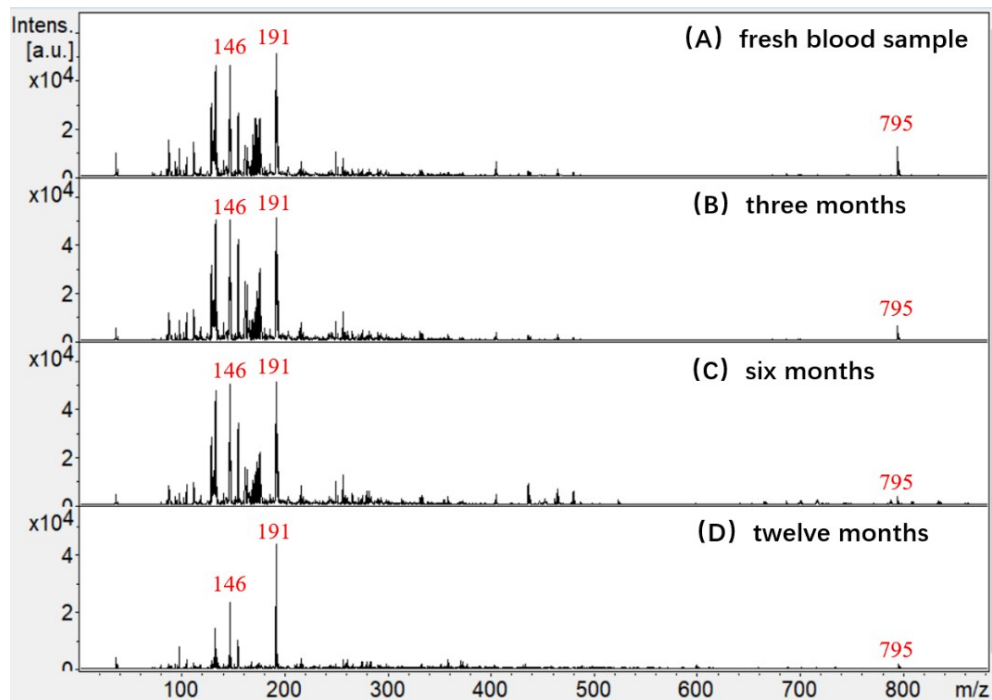

**Figure S2.** Mass spectra of seminal fluid with different storage time. (A) fresh blood sample. (B) storage for three months. (C) storage for six months. (D) storage for a year. The peaks that are labeled represents the characteristic peaks of seminal fluid.

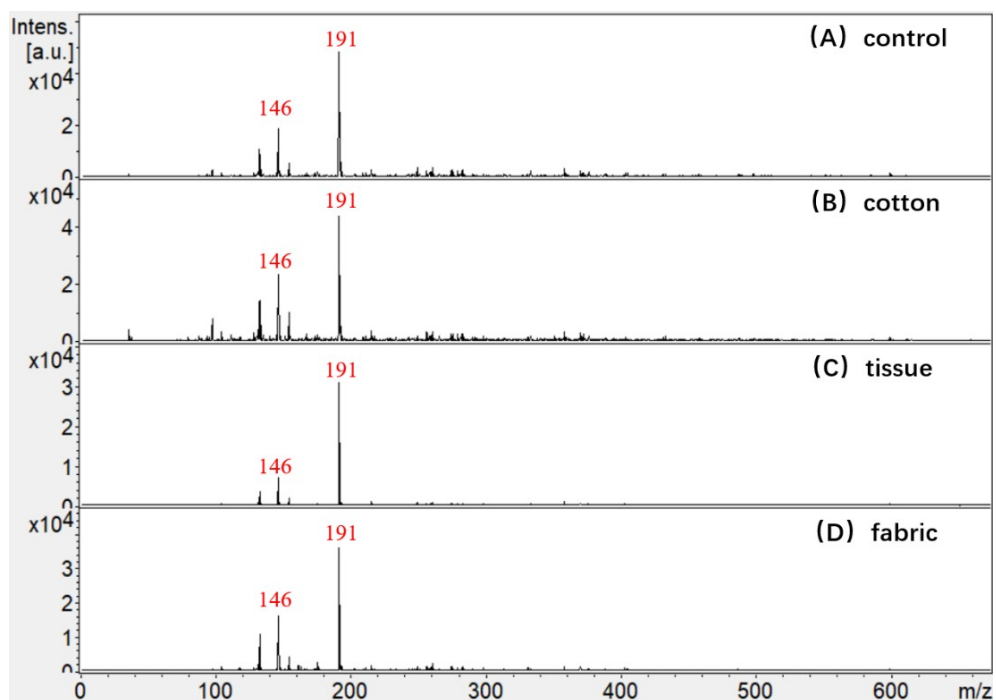

**Figure S3.** Mass spectra of seminal fluid deposited on different materials. (A) no deposition. (B) cotton (C) tissue (D) fabric. The peaks that are labeled represents the characteristic peaks of seminal fluid.



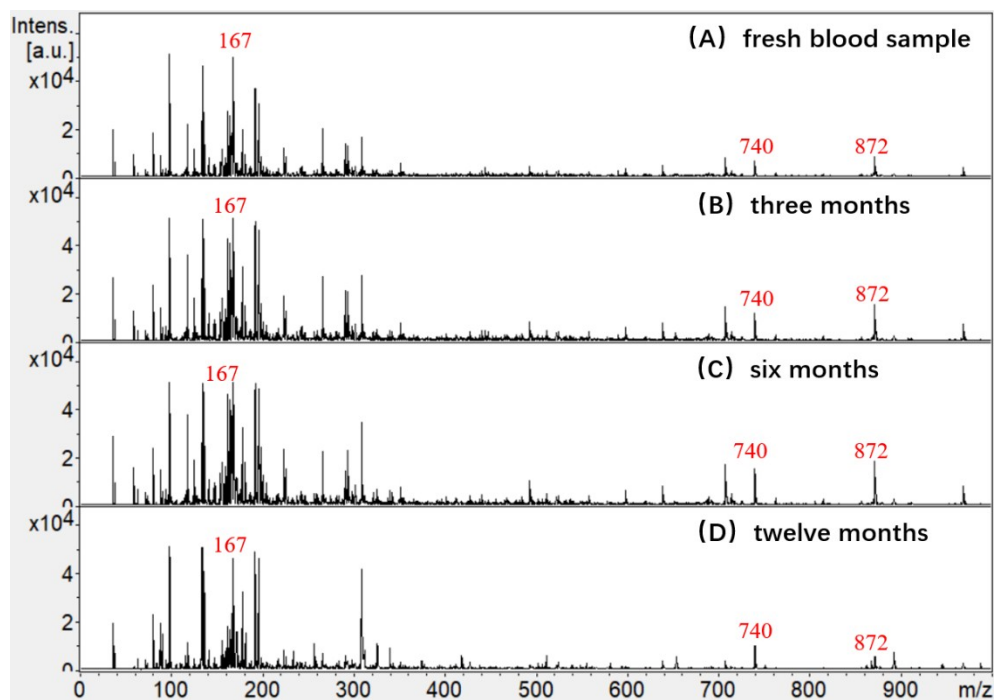

**Figure S4.** Mass spectra of saliva with different storage time. (A) fresh blood sample. (B) storage for three months. (C) storage for six months. (D) storage for a year. The peaks that are labeled represents the characteristic peaks of saliva.

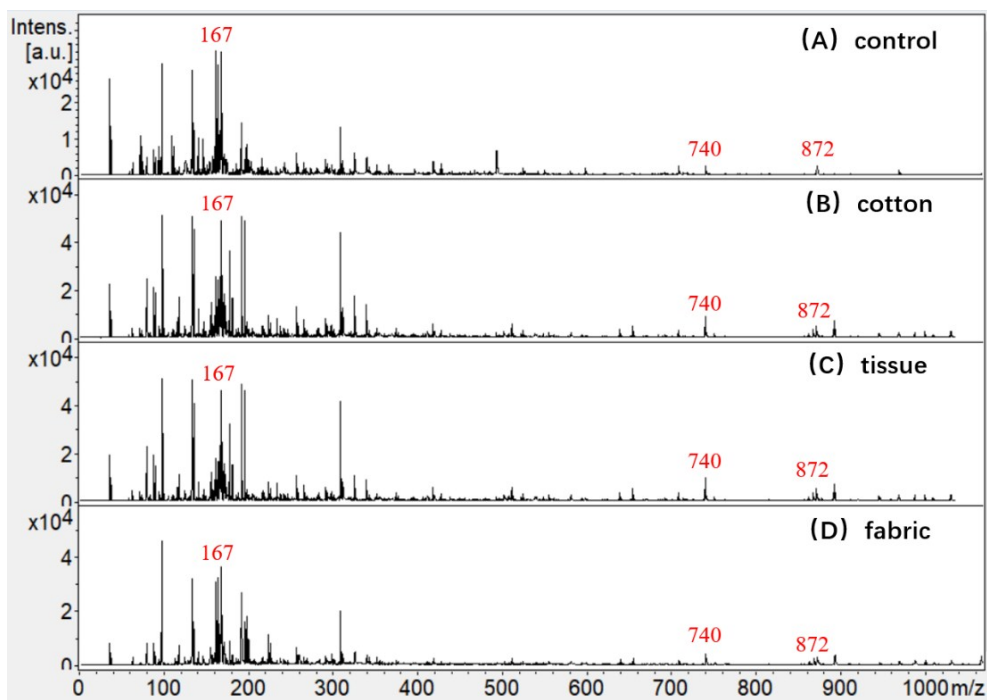

**Figure S5.** Mass spectra of saliva with different storage time. (A) fresh blood sample. (B) storage for three months. (C) storage for six months. (D) storage for a year. The peaks that are labeled represents the characteristic peaks of saliva

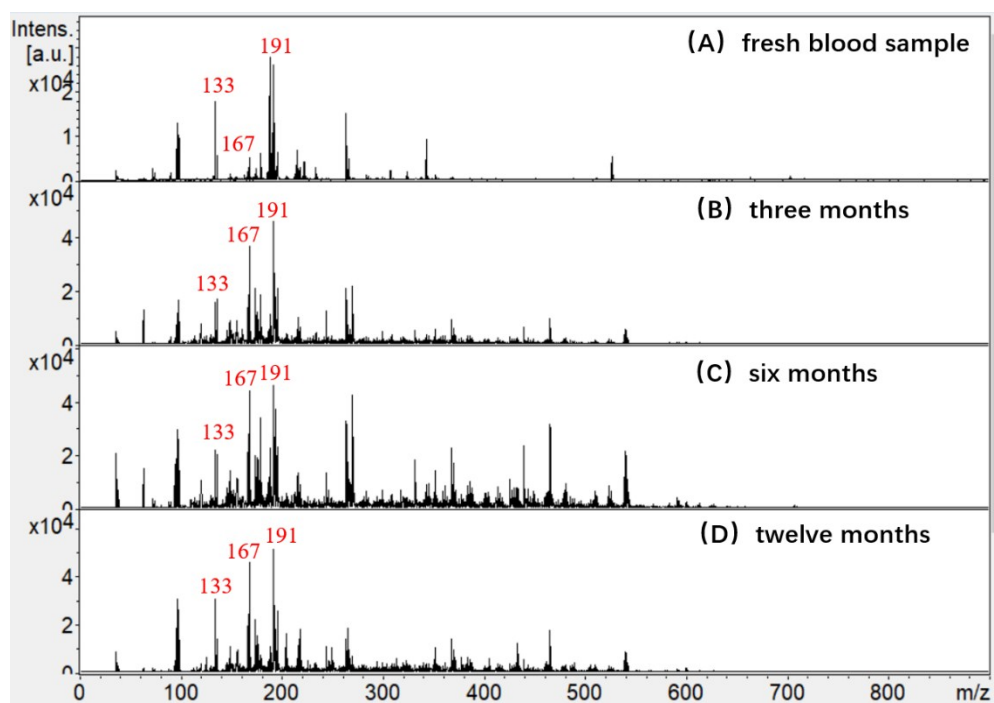

**Figure S6.** Mass spectra of urine with different storage time. (A) fresh blood sample. (B) storage for three months. (C) storage for six months. (D) storage for a year. The peaks that are labeled represents the characteristic peaks of urine.

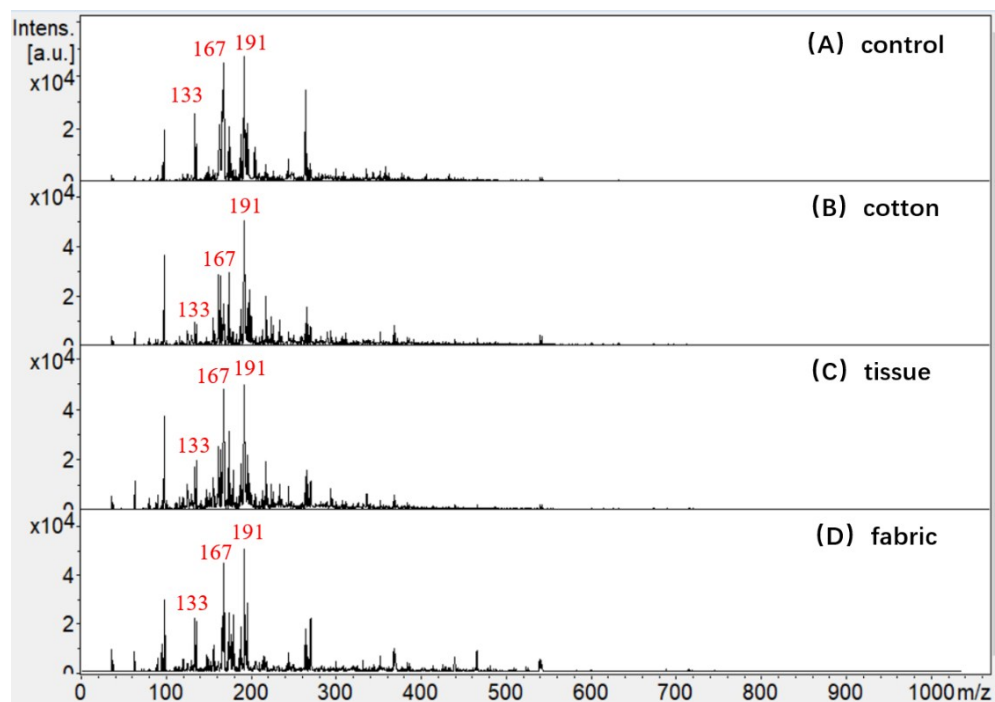

**Figure S7.** Mass spectra of urine with different storage time. (A) fresh blood sample. (B) storage for three months. (C) storage for six months. (D) storage for a year. The peaks that are labeled represents the characteristic peaks of urine.

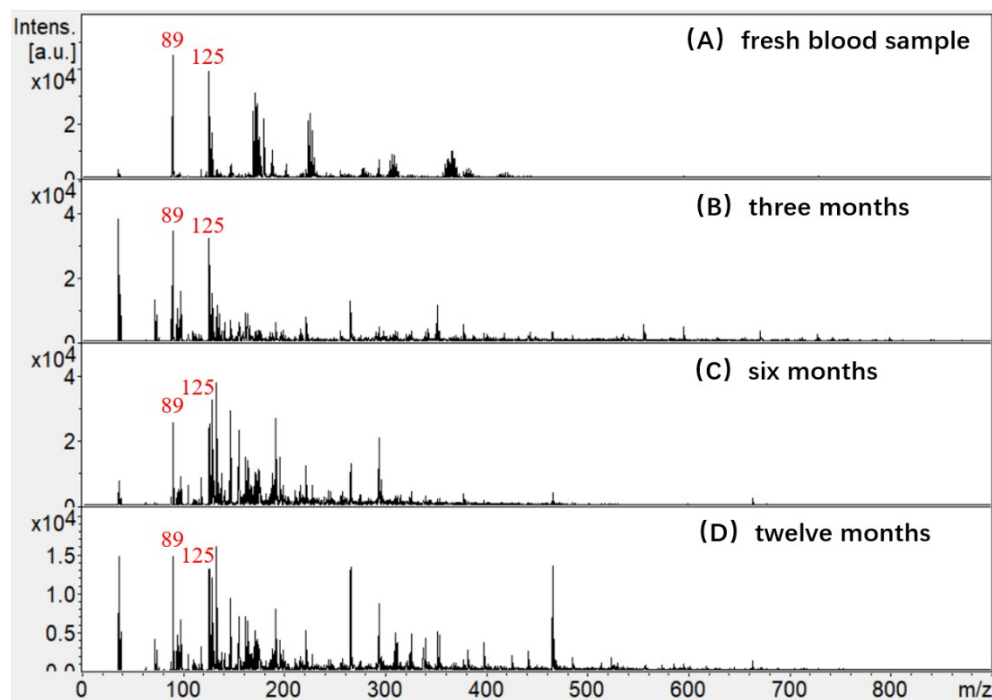

**Figure S8.** Mass spectra of sweat with different storage time. (A) fresh blood sample. (B) storage for three months. (C) storage for six months. (D) storage for a year. The peaks that are labeled represents the characteristic peaks of sweat.

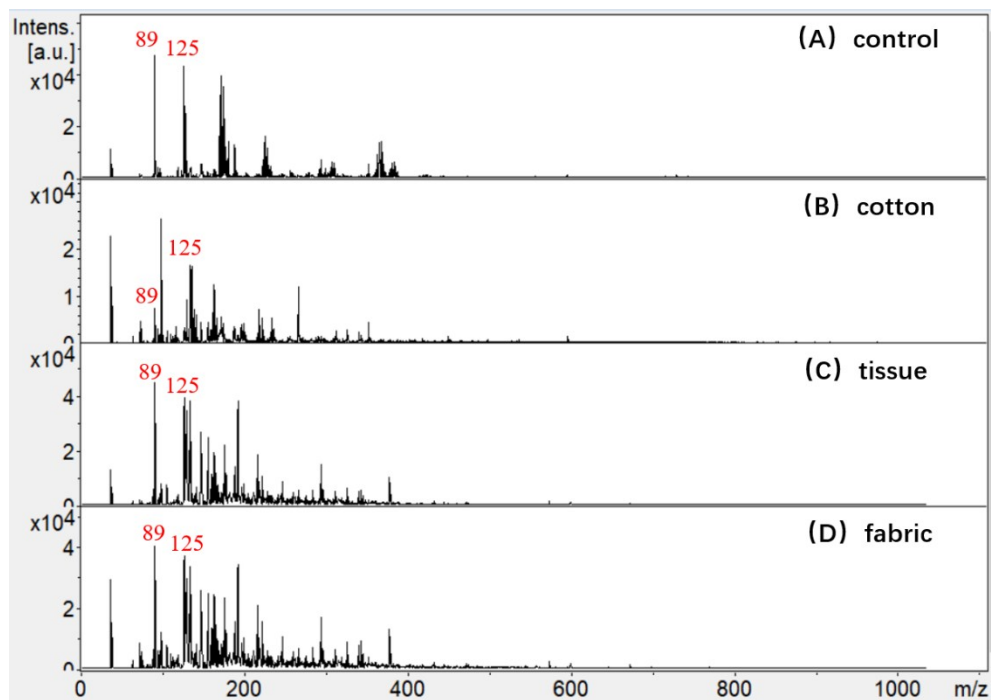

**Figure S9.** Mass spectra of sweat with different storage time. (A) fresh blood sample. (B) storage for three months. (C) storage for six months. (D) storage for a year. The peaks that are labeled represents the characteristic peaks of sweat.

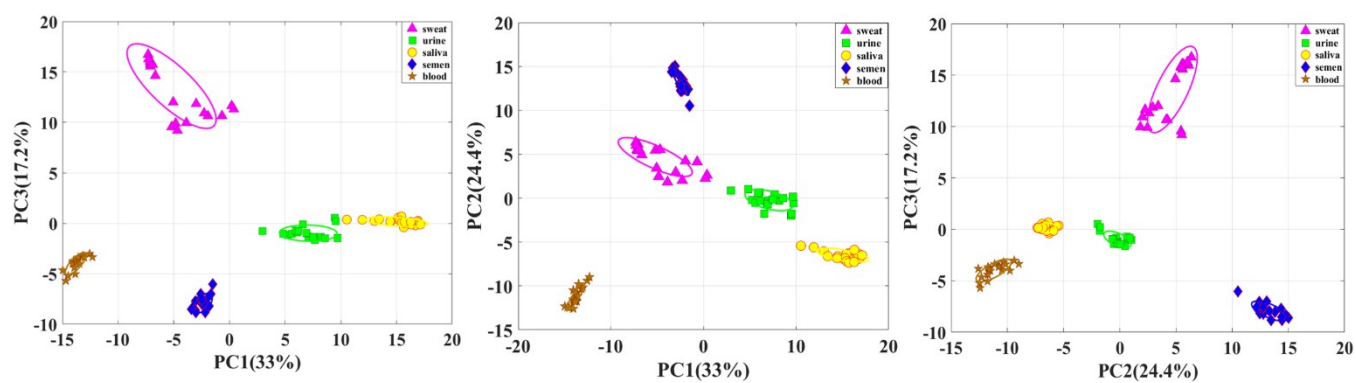

**Figure S10.** 2D plots of the principle component analysis (PCA) scores for the matrix assisted laser desorption ionization mass spectrometry (MALDI-MS) data from five kinds of body fluids.

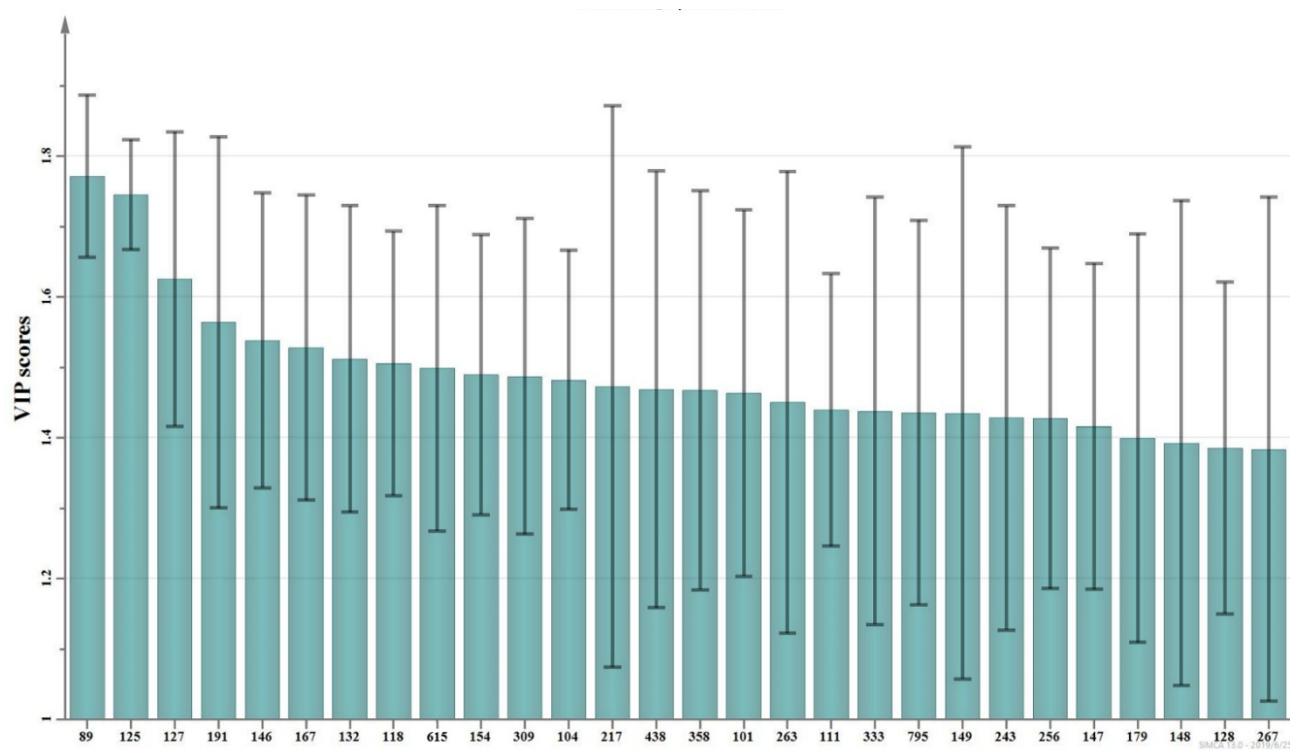

**Figure S11.** Variable importance for the projection (VIP) scores from partial least-squares discriminant analysis (PLS-DA) for MS data from five kinds of human body fluids.



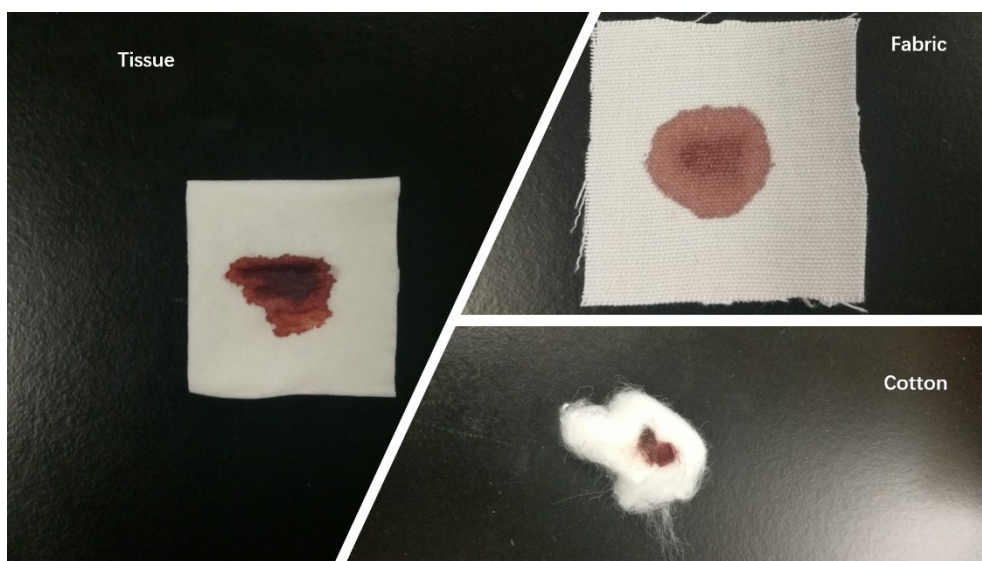

**Figure S12.** Photographs of human body fluids deposited on different materials.

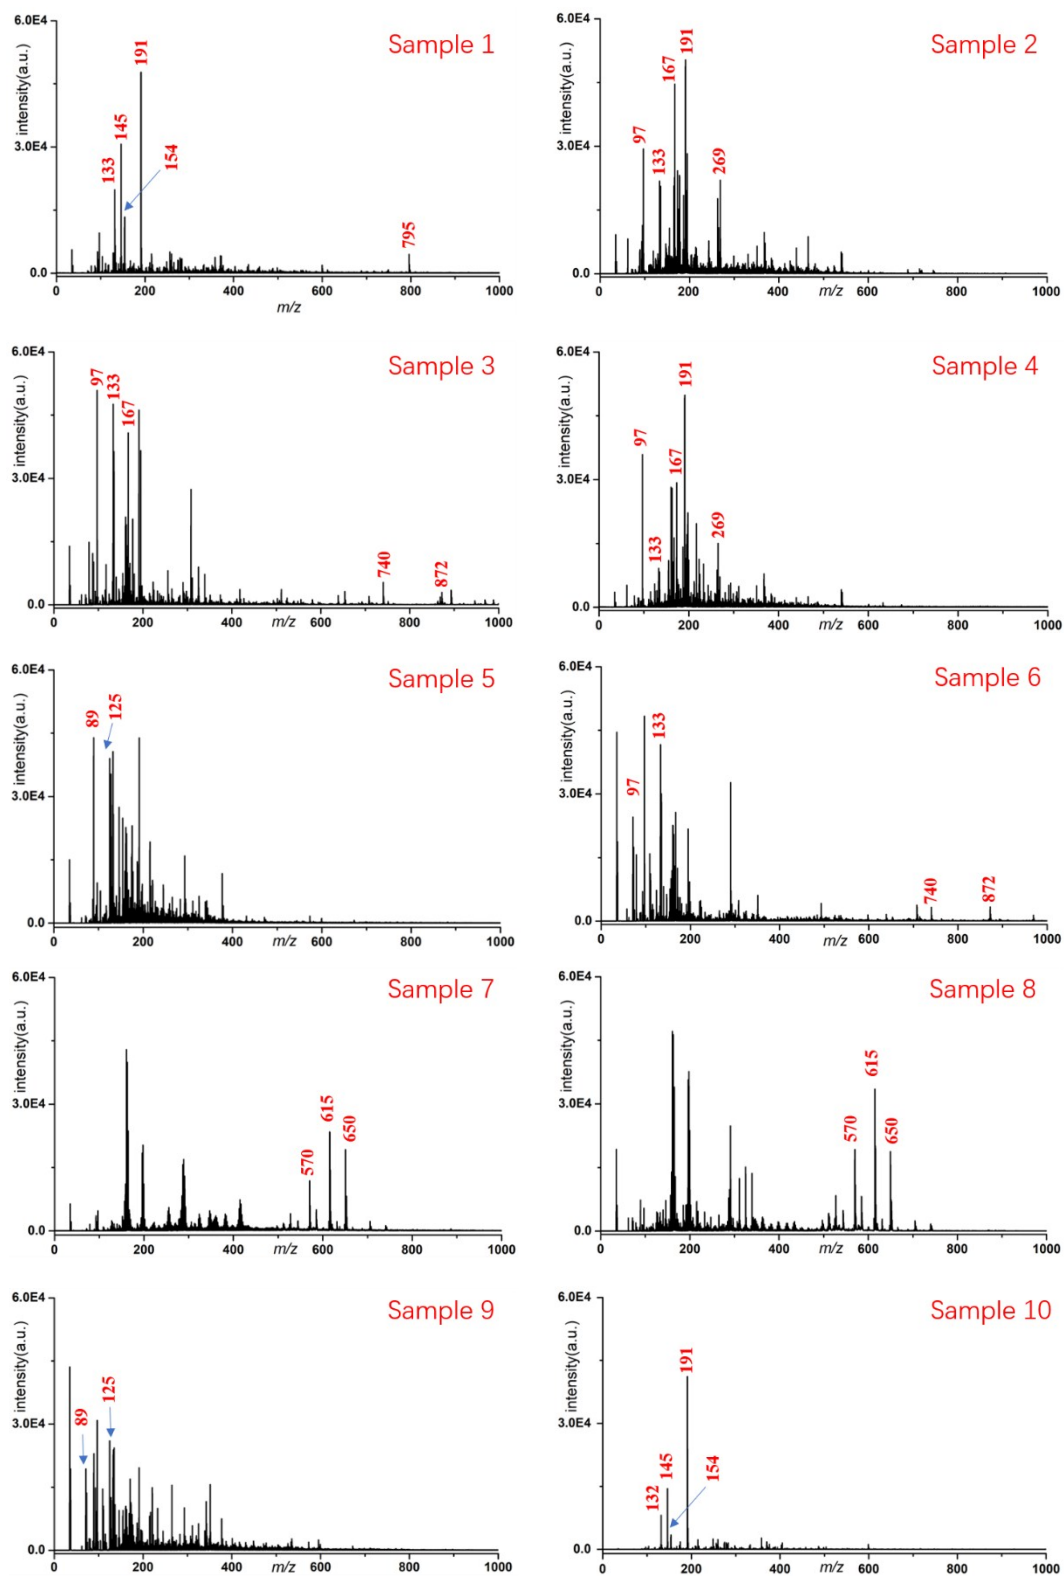

**Figure S13.** Mass spectra of ten unknown human body fluid samples deposited on different carrier materials.
